# Supplementary material
Source: Springer Nature journal article supplement (https://www.springermedizin.de/resource/supplementary/12891_2009_655_MOESM3_ESM.pdf/9506486)
Supplement: MOESM3 [file 9506486]

**Additional File 3** Associated (cross-sectional studies) and risk (prospective studies) factors for TSP grouped according to biopsychosocial categories. Estimates are expressed as an odds ratio (95% CI) unless indicated otherwise. An OR>1 refers to a positive association with TSP, while and OR<1 refers to a negative association. Where correlation coefficients are reported, positive values represent a positive association with TSP, while negative values represent a negative association. For statistical tests which do not test for association, a significant outcome (p<0.05) refers to the factor being greater among individuals with TSP.

| Factor                                        | Association estimate                                               | Risk estimate |
|-----------------------------------------------|--------------------------------------------------------------------|---------------|
| Concurrent musculoskeletal pain               |                                                                    |               |
| § Concurrent neck pain                        | 2.3 (1.5-3.5) [13]; chi square analysis (p<0.05) [48]; r=0.32 [66] |               |
| § Concurrent low back pain                    | 2.9 (1.8-4.5) [13]; r=0.34 [66]                                    |               |
| § Concurrent upper limb pain                  | r=0.25 [66]                                                        |               |
| § Concurrent chest pain                       | r=0.25 [66]                                                        |               |
| § Concurrent lower limb pain                  | r=0.21 [66]                                                        |               |
| § Concurrent buttock pain                     | r=0.22 [66]                                                        |               |
| § Headache in last month                      | 2.9-5.2 (1.4-10.5) [50]                                            |               |
| § Previous treatment for musculoskeletal pain | 2.4 (1.5-3.7) [50]                                                 |               |
| Growth and physical factors                   |                                                                    |               |
| Puberty (Tanner II)*                          | 1.4 (0.7-2.8) [57]                                                 |               |
| Puberty (Tanner III)*                         | 1.6 (0.5-5.4) [57]                                                 |               |

|                                                    |                                                        |                                                              |
|----------------------------------------------------|--------------------------------------------------------|--------------------------------------------------------------|
| Puberty (Tanner IV)*                               | 1.0 (0.5-2.1) [57]                                     |                                                              |
| Puberty (Tanner V)*                                | 1.1 (0.6-2.3) [57]                                     |                                                              |
| § Age                                              | 0.7 (0.4-1.3) [40]; 1.1 (0.9-1.4) [44]; r=0.009 [65]   | 6.3 (1.2-43.0)<br>boys [12]; 2.8<br>(0.7-11.4) girls<br>[12] |
| § Gender (female v male)                           | 2.2 (0.9-5.4) [40]; 6.1 (2.2-16.9) [44]; r= -0.21 [65] |                                                              |
| Height                                             | r= -0.03 [65]                                          |                                                              |
| Weight                                             | r= -0.01 [65]                                          |                                                              |
| Body mass index                                    | 0.9 (0.8-1.0) [44]; r= -0.002 [65]                     |                                                              |
| Functional stability (Matthias Test)               | 1.7 (1.0-2.8) [40]                                     |                                                              |
| § Difficulty with daily movements (mobility score) | r=0.12 [55]                                            |                                                              |

#### Lifestyle and social factors

|                                                                                                                                             |                                                                                                                                                                                                                                   |
|---------------------------------------------------------------------------------------------------------------------------------------------|-----------------------------------------------------------------------------------------------------------------------------------------------------------------------------------------------------------------------------------|
| § German speaking                                                                                                                           | 0.2 (0.1-0.5) [40]                                                                                                                                                                                                                |
| Sports participation (not playing vs. playing)                                                                                              | 0.5 (0.2-1.0) [44]; 23.0% vs. 23.0% (p>0.05) [67]                                                                                                                                                                                 |
| Hours per week of participation of sport activity in general                                                                                | No significant difference reported (data not reported) [67]                                                                                                                                                                       |
| § Participation in a specific sport vs no sport at all (difference in proportion with and without TSP as well as OR [95% CI] where logistic | Jump gymnastics (p=0.6), rhythmic gymnastics (p=0.4), soccer (p=0.9), other ball games (p=0.8), swimming (p=0.6), badminton/tennis (p=0.3), horse riding (p=0.7), running (p=0.9), cycling (p=0.8), roller skating/skate boarding |

|                                                                                                                                                                      |                                                                                                                                                                                                                                                                                                             |                    |
|----------------------------------------------------------------------------------------------------------------------------------------------------------------------|-------------------------------------------------------------------------------------------------------------------------------------------------------------------------------------------------------------------------------------------------------------------------------------------------------------|--------------------|
| regression significant)                                                                                                                                              | (p=0.02; OR 3.1 [1.18-8.08]), martial arts (p=0.5), others (p=0.7) [67]                                                                                                                                                                                                                                     |                    |
| § Participation in a specific sport vs all other sports (difference in proportion with and without TSP as well as OR [95% CI] where logistic regression significant) | Jump gymnastics (p=0.6), rhythmic gymnastics (p=0.5), soccer (p=0.5), other ball games (p=0.8), swimming (p=0.4), badminton/tennis (p=0.09), horse riding (p=0.5), running (p=0.9), cycling (p=0.6), roller skating/skate boarding (p=0.001; OR 3.5 [1.58-7.64]), martial arts (p=0.6), others (p=0.7) [67] |                    |
| Transport to and from school on foot or by car vs. other means (bus, bicycle)                                                                                        | 1.4 (0.7-3.1) [44]                                                                                                                                                                                                                                                                                          |                    |
| Leisure physical activity between individuals with and without pain (mean MET index) ^                                                                               | F=1.5 (p=0.22) [45]                                                                                                                                                                                                                                                                                         |                    |
| Weekly physical activity (sum METs per week)                                                                                                                         |                                                                                                                                                                                                                                                                                                             | 1.0 (1.0-1.0) [69] |
| **                                                                                                                                                                   |                                                                                                                                                                                                                                                                                                             |                    |
| Musical instrument (playing vs. not) **                                                                                                                              |                                                                                                                                                                                                                                                                                                             | 1.0 (0.5-2.4) [69] |
| Working (working vs. not) **                                                                                                                                         |                                                                                                                                                                                                                                                                                                             | 1.3 (0.7-2.5) [69] |

Factors related to backpack use

|                                                |                                                                              |  |
|------------------------------------------------|------------------------------------------------------------------------------|--|
| § Carrying backpack on two vs. one shoulder    | 0.4 (0.2-0.9) [44]                                                           |  |
| § Backpack weight                              | 1.0 (0.7-1.3) [44]; r=0.16 [65]                                              |  |
| § Backpack weight as proportion of body weight | Univariate regression analysis ( $\beta=0.05$ , $p<0.05$ ) [48]; r=0.09 [65] |  |
| § Backpack weight as proportion of body height | r=0.15 [65]                                                                  |  |
| Duration of backpack carrying                  | 1.0 (0.9-1.0) [44]                                                           |  |

|                                |                     |
|--------------------------------|---------------------|
| Backpack weight 1.9-2.5 kg †   | 1.0 (0.5-2.21) [50] |
| Backpack weight 2.6-3.3 kg †   | 0.7 (0.4-1.5) [50]  |
| § Backpack weight 3.4-4.4 kg † | 2.2 (1.2-4.3) [50]  |
| Backpack weight 4.5-9.4 kg †   | 1.2 (0.6-2.3) [50]  |

#### Postural factors

|                                                                    |                                                                  |
|--------------------------------------------------------------------|------------------------------------------------------------------|
| Kyphosis with backpack                                             | 1.0 (1.0-1.1) [44]                                               |
| Kyphosis without backpack                                          | 1.0 (1.0-1.1) [44]; r=0.04 [65]; chi square = 0.16 (p=0.98) [62] |
| Kyphosis difference (with – without backpack)                      | 1.0 (0.9-1.1) [44]                                               |
| Lordosis with backpack                                             | 1.0 (1.0-1.1) [44]                                               |
| § Lordosis without backpack                                        | 1.1 (1.0-1.2) [44]; r=0.01 [65]; chi square = 2.17 (p=0.54) [62] |
| § Lordosis difference (with – without backpack)                    | 0.9 (0.8-1.0) [44]                                               |
| Craniocervical angle with backpack                                 | 1.0 (0.9-1.1) [44]                                               |
| Craniocervical angle without backpack                              | 1.0 (0.9-1.1) [44]                                               |
| Craniocervical angle difference (with – without backpack)          | 1.0 (0.9-1.1) [44]                                               |
| Biacromial line without backpack (degrees of shoulder level shift) | 1.3 (0.9-1.9) [44]                                               |
| § Biacromial line with backpack (degrees of shoulder level shift)  | 1.3 (1.0-1.5) [44]                                               |
| Biacromial inclination difference (with –                          | 1.2 (1.0-1.4) [44]                                               |

without backpack)

Coronal trunk inclination without backpack 1.6 (0.6-4.2) [44];  $r=0.009$  [65]; chi square = 0.009 ( $p=0.96$ ) [62]

§ Coronal trunk inclination with backpack 2.3 (1.2-4.3) [44]

§ Coronal trunk inclination difference (with – without backpack) 2.1 (1.1-4.0) [44]

Sagittal trunk inclination without backpack 1.8 (1.0-3.2) [44]

Sagittal trunk inclination with backpack 1.0 (0.6-1.8) [44]

Sagittal trunk inclination difference (with – without backpack) 0.7 (0.5-1.1) [44]

Pelvic tilt Chi square = 1.49 ( $p=0.48$ ) [62]

§ Low number of trunk flexion movements while sitting Mann Whitney U-test ( $p<0.05$ ) [49]

Having back twisted (0-10 min vs. no) 1.6 (0.9-2.6) [50]

§ Having back twisted (> 10 min vs. no) 2.2 (1.2-3.8) [50]

#### Psychological factors

§ Difficulty with homework (sometimes vs. no) 3.5 (1.5-8.1) [50]

§ Difficulty with homework (yes vs. no) 4.3 (1.5-12.6) [50]

§ 5 item mental health index \*\* 1.4 (1.2-1.9) [69]

#### Environmental factors

Self assessed chair height too high ‡ 0.7 (0.2-2.5) [50]

§ Self assessed chair height too low ‡ 2.0 (1.1-3.4) [50]

Self assessed chair height don't know

1.6 (0.9-2.8) [50]

---

\* reference = Tanner I

† reference = 0-1.8kg

‡ reference = correct chair height

§ statistically significant factor ( $p < 0.05$ )

^ adjusted for age and gender

\*\* adjusted for growth spurt, initial body height, BMI, age, gender, smoking
